# Supplementary material for: Transcripts with in silico predicted RNA structure are enriched everywhere in the mouse brain
Source: PubMed Central journal article supplement (PMC3464589; doi:10.1186/1471-2164-13-214), 2012-05-31
Supplement: 1471-2164-13-214-S2.pdf [file 1471-2164-13-214-S2.pdf]

# Additional file 1

Transcripts with *in silico* predicted RNA structure are enriched everywhere in the mouse brain

Stefan E Seemann, Susan M Sunkin, Michael J Hawrylycz, Walter L Ruzzo, Jan Gorodkin

## Additional Information

### *P*-value estimation

The *P*-values are estimated in a similar way as in Torarinsson *et al.* (2008). An observation is significant if the observed number of hits cannot be described by chance. The *P*-value is calculated using the normal approximation to the binomial distribution that is implemented in R by the function `pnorm`

$$P[X > x] = \text{pnorm}(M, \mu, \sigma, \text{lower.tail}=\text{F})$$

where *M* is the observed number of non-overlapping RNA motifs that overlap the target set,  $\mu = N \times Pr$ ,  $\sigma = \sqrt{N \times Pr \times (1 - Pr)}$ , *Pr* is the probability of each RNA motif to hit a target, and *N* is the number of all RNA motifs.

### Fisher's exact test for enrichment of structured UTR transcripts in synapses

We found 27 genes with structured UTRs (out of 5,122 structured UTR probes) and 10 genes without UTR structures (out of 4459 non-structured UTR probes) that are known to be located in synapses (out of 76 proteins known to be located in synapses). The significance of more proteins in synapses coded by mRNAs with structured UTRs is tested by Fisher's exact test using the R function

`fisher.test(data, alternative="g")`: *p*-value = 0.002285

|             | Structured UTR | Non-structured UTR          |
|-------------|----------------|-----------------------------|
| Synapse     | 27             | 11 = round(10*(5122/4459))  |
| Non-synapse | 49 = 76-27     | 65 = round(76-10*5122/4459) |

### Structured UTRs and RNA binding proteins

21,269 CMfinder predicted structures are located in UTRs (strand unspecific) and have an average length of 75 nts. These UTR structures and their 50 nts flanking regions are searched for potential protein binding motifs collected in RBPDB (Cook *et al.*, 2010). First, we used the perl TFBS library (Lenhard and Wasserman, 2002) to scan our sequences against position weight matrices (PWMs) from 72 RNA binding proteins, and second, we sequence aligned (BLAT) our sequences against 1,021 individual RNA sequences from single-sequence experiments excluding consensus (IUPAC) sequences. The protein binding sites are correlated with their position in CMfinder motifs, whereas protein binding sites in stems are defined to cover more or equal than 50% base pairs. In approximately 90% of UTR structures, at least one binding motif was found to only 21 proteins. Using DAVID we found "RNA metabolic process" (*p*-value = 2.5E-17) as the second most significant gene ontology term directly after "RNA binding" (*p*-value = 1.1E-18). The binding sites are enriched neither in the 5' flanking region, the RNA motif, nor the 3' flanking region. The RNA binding protein *Vts1* mostly binds UTRs in stem regions, whereas the binding motifs of the other proteins are mostly found 5' and 3' of the predicted UTR structures (see Supplementary Table S4). Surprisingly, motifs inside UTR structures appear more frequently in stems than in loop regions.

## Additional Tables

**Table S1:** Probabilities ( $P$ -values) that the overlap of **CMfinder** candidate regions and Allen Mouse Brain Atlas (Atlas) probes can be explained by chance. The rows stand for (1) the considered lower (exclusive) and upper (inclusive) boundary of considered  $GC$  contents; (2) the number  $N$  of all RNA motifs; (3) the amount of *Atlas probes*; (4) the probability  $Pr$  of each RNA motif to hit a target; (5) the mean value  $\mu = N \times Pr$ ; (6) the standard deviation  $\sigma = \sqrt{N \times Pr \times (1 - Pr)}$ ; (7) the observe number  $M$  of non-overlapping RNA motifs that overlap the target set; and (8) the calculated  $P$ -value using the normal approximation to the binomial distribution (Torarinsson *et al.*, 2008).

| gc content  | total     | (0-35]   | (35-40]                 | (40-45]                | (45-50]                | (50-100]                |
|-------------|-----------|----------|-------------------------|------------------------|------------------------|-------------------------|
| N           | 434,526   | 77,107   | 51,677                  | 58,382                 | 71,147                 | 175,354                 |
| Atlas probe | 23,016    | 493      | 1,522                   | 3,719                  | 6,134                  | 11,148                  |
| Pr          | 0.014690  | 0.001206 | 0.004832                | 0.011618               | 0.021423               | 0.040831                |
| $\mu$       | 6,383.257 | 92.966   | 249.686                 | 678.278                | 1,524.188              | 7,159.837               |
| $\sigma$    | 79.306    | 9.636    | 15.763                  | 25.892                 | 38.620                 | 82.870                  |
| M           | 13,362    | 596      | 756                     | 1,089                  | 1,852                  | 9,101                   |
| $P$ -value  | 0         | 0        | $1.16 \times 10^{-226}$ | $5.73 \times 10^{-57}$ | $1.05 \times 10^{-17}$ | $1.21 \times 10^{-121}$ |

**Table S2:** Known functional RNA motifs in Allen Mouse Brain Atlas probes with CMfinder predicted secondary RNA structure. CMfinder motifs that overlap the annotated RNA motif are listed in the third column.

| Expressed structured putative ncRNAs with known RNA motif |                                                     |                                                                                           |
|-----------------------------------------------------------|-----------------------------------------------------|-------------------------------------------------------------------------------------------|
| Atlas probe                                               | Known RNA motif                                     | CMfinder motif                                                                            |
| Mirg                                                      | mmu-mir-410;mir-154                                 |                                                                                           |
| LOC381754                                                 | mir-544                                             |                                                                                           |
| mCG1030139                                                | ACA17                                               |                                                                                           |
| mCG1044749.1                                              | SNORD49;SNORD65                                     |                                                                                           |
| 0610007N19Rik                                             | SNORD123                                            |                                                                                           |
| 9430008C03Rik                                             | ACA39;ACA60;SNORA71                                 |                                                                                           |
| 4933416E14Rik                                             | mir-692                                             |                                                                                           |
| E130102H24Rik                                             | mmu-mir-101a                                        |                                                                                           |
| Xist                                                      | Xist                                                |                                                                                           |
| Expressed probes with UTR structures with known RNA motif |                                                     |                                                                                           |
| Atlas probe                                               | Known RNA motif                                     | CMfinder motif                                                                            |
| Hist1h2ac                                                 | Histone3                                            |                                                                                           |
| A930034L06Rik                                             | ACA39;ACA60;SNORA71                                 |                                                                                           |
| E130103I17Rik                                             | mir-220                                             |                                                                                           |
| Samd12                                                    | ACA17-related                                       |                                                                                           |
| 9630011N22Rik                                             | 7SK_RNA-related                                     |                                                                                           |
| Egfl7                                                     | mmu-mir-126                                         |                                                                                           |
| Asgr1                                                     | hsa-mir-195                                         |                                                                                           |
| Atp6v0e                                                   | U19-2                                               |                                                                                           |
| Bag1                                                      | IRES_Bag1                                           | mm8chr4/41136750-41136844                                                                 |
| Bet1                                                      | SNORA40                                             |                                                                                           |
| Csf3                                                      | G-CSF_SLDE                                          | mm8chr11/98519181-98519449                                                                |
| Eif4a1                                                    | HBI-61;snoU6-77;U67;SNORA63;SNORA4                  |                                                                                           |
| Eif4a2                                                    | SNORA63;SNORA4;SNORA81                              |                                                                                           |
| Fgf13                                                     | mmu-mir-504                                         |                                                                                           |
| Ctgf                                                      | CAESAR                                              |                                                                                           |
| Fmr1                                                      | SNORA25                                             |                                                                                           |
| Gpx2                                                      | SECIS                                               | mm8chr12/77711209-77711380                                                                |
| Gpx3                                                      | SECIS;Histone3                                      | mm8chr11/54753593-54753702                                                                |
| H3f3a                                                     | Histone3                                            |                                                                                           |
| 0610005G16Rik*                                            | Mitoch..tRNA-derived_pseudogene;<br>SRP_RNA-related | mm8chr11/54753593-54753702                                                                |
| 0610006F12Rik*                                            | Mitoch..tRNA-derived_pseudogene                     | mm8chr1/24567364-24567508                                                                 |
| Hebp1                                                     | ACA17-related                                       |                                                                                           |
| D830047O19Rik*                                            | Mitoch..tRNA-derived_pseudogene                     | mm8chrM/11435-11752                                                                       |
| E330014M11Rik*                                            | Mitoch..tRNA-derived_pseudogene                     | mm8chrM/11435-11752                                                                       |
| Igf2                                                      | mmu-mir-483;IRES_IGF2                               |                                                                                           |
| Kcnc1                                                     | K_chan_RES                                          |                                                                                           |
| Kcns2                                                     | K_chan_RES                                          |                                                                                           |
| Krt36                                                     | mir-492                                             | mm8chr11/99920569-99920618                                                                |
| Lhx2                                                      | mir-1302                                            |                                                                                           |
| mt-Nd3                                                    | Mitoch..tRNA-derived_pseudogene;<br>SRP_RNA-related | mm8chrM/7533-7853                                                                         |
| Npn1                                                      | mir-199a-2;mir-214                                  | mm8chr1/164060043-164060137;<br>mm8chr1/164054462-164054592<br>mm8chr10/80231399-80231516 |
| Oaz1                                                      | Antizyme_FSE                                        |                                                                                           |
| Prnp                                                      | Prion_pknot                                         |                                                                                           |
| Psm5                                                      | mmu-mir-686                                         |                                                                                           |
| Ranbp1                                                    | SNORA77                                             |                                                                                           |
| Sepp1                                                     | SECIS                                               | mm8chr15/3229965-3230081                                                                  |

Table S2: continued

| Expressed probes with UTR structures with known RNA motif |                                                                       |                                                                                                                     |
|-----------------------------------------------------------|-----------------------------------------------------------------------|---------------------------------------------------------------------------------------------------------------------|
| Atlas probe                                               | Known RNA motif                                                       | CMfinder motif                                                                                                      |
| Sepw1                                                     | SECIS                                                                 |                                                                                                                     |
| Synj2bp                                                   | SNORA40                                                               |                                                                                                                     |
| Map2k4                                                    | hsa-mir-744                                                           |                                                                                                                     |
| Zfp275                                                    | U13-related                                                           |                                                                                                                     |
| Sepx1                                                     | SECIS                                                                 |                                                                                                                     |
| Hist1h1e                                                  | Histone3                                                              | mm8chr13/23629246-23629295;<br>mm8chr13/23628150-23628191                                                           |
| Fbxo8                                                     | mir-692                                                               |                                                                                                                     |
| Ywhab                                                     | ACA51-related                                                         |                                                                                                                     |
| Phca                                                      | U87                                                                   |                                                                                                                     |
| Cks2                                                      | ACA2b;ACA34                                                           |                                                                                                                     |
| 1810032O08Rik                                             | snR38A;R38c                                                           | mm8chr11/116490689-116490759                                                                                        |
| Ppp1r2                                                    | U6atac-related                                                        |                                                                                                                     |
| Rps20                                                     | U54-related                                                           |                                                                                                                     |
| Tomm20                                                    | ACA14a;ACA14b                                                         |                                                                                                                     |
| Hist1h2bc                                                 | Histone3                                                              |                                                                                                                     |
| Lyzl4                                                     | mir-544                                                               |                                                                                                                     |
| 2310037I24Rik                                             | ACA2a;ACA2b;ACA34                                                     |                                                                                                                     |
| Whrn                                                      | mir-1302                                                              |                                                                                                                     |
| Cpne4                                                     | mir-340                                                               | mm8chr9/104891764-104891932                                                                                         |
| D1Bwg1363e                                                | mir-671                                                               |                                                                                                                     |
| Ubap2l                                                    | ACA58                                                                 |                                                                                                                     |
| Josd3                                                     | ACA1;ACA18;ACA32;<br><br>SNORA8;SNORD5;SNORD6<br><br>SNORA40;SNORA25; | mm8chr9/15067056-15067194;<br>mm8chr9/15066882-15066976;<br>mm8chr9/15064196-15064310;<br>mm8chr9/15062989-15063046 |
| Plekhj1                                                   | mir-1227                                                              |                                                                                                                     |
| BC005537                                                  | ACA32                                                                 |                                                                                                                     |
| Sep15                                                     | ACA2b;SECIS                                                           | mm8chr3/144534889-144535065                                                                                         |
| Adcy3                                                     | hsa-mir-208a                                                          |                                                                                                                     |
| Tsr1                                                      | SNORD91                                                               |                                                                                                                     |
| Grik4                                                     | GRIK4_3p_UTR                                                          | mm8chr9/42271752-42271786                                                                                           |
| Hlcs                                                      | mir-692                                                               |                                                                                                                     |
| Sec63                                                     | RNaseP_nuc;RNaseP_RNA                                                 |                                                                                                                     |
| Peg10                                                     | RF_site4                                                              | mm8chr6/4705305-4705398                                                                                             |
| Ell2                                                      | ACA67;ACA67B;SNORA42                                                  |                                                                                                                     |
| Pank3                                                     | mmu-mir-103-1;mir-107                                                 |                                                                                                                     |
| Arhgef11                                                  | mir-765                                                               |                                                                                                                     |
| Xist                                                      | Xist                                                                  | mm8chrX/99668220-99668249;<br>mm8chrX/99668083-99668145                                                             |
| Hmbox1                                                    | mir-544                                                               |                                                                                                                     |
| 1700021K19Rik                                             | mir-922                                                               |                                                                                                                     |
| Grfl1                                                     | hsa-let-7e;hsa-mir-99b                                                | mm8chr7/15655923-15655955                                                                                           |
| Tnrc6a                                                    | U6                                                                    |                                                                                                                     |
| 6230410P16Rik                                             | hsa-let-7g;mir-135                                                    | mm8chr9/106013147-106013216;<br>mm8chr9/106012241-106012297<br>mm8chr15/80077412-80077451                           |
| Smcr7l                                                    | hsa-mir-658                                                           |                                                                                                                     |
| Nars2                                                     | mir-684                                                               |                                                                                                                     |
| Hist1h3f                                                  | Histone3                                                              | mm8chr13/23552317-23552415                                                                                          |
| Ntrk2                                                     | IRES_TrkB                                                             | mm8chr13/58818172-58818224                                                                                          |

**Table S3:** Spatial correlated expression with  $\rho \geq 0.9$  of structured UTR probes and transcripts coding for RNA binding proteins. *Neurod1*, *Prpf31*, *Tnfrsf12a*, *Ssbp4*, *Ppfia1*, *Rsf1*, *Rc3h1*, *Cnksr2*, *Prpf38a*, *Ppp1r9a*, *Lcp2*, *Cnksr3*, *Zc3hav1*, *Sfrs1*, *Samd4b*, *Prpf38b* and *Lancl1* code for an RNA binding protein and have a structured UTR. The plane orientation of all examples is the same for both transcripts. Brain region abbreviations: pallium, PAL; thalamus, TH; interbrain, IB; Hippocampal region, HIP; medulla, MY; Brain stem, BS; hypothalamus, HY; pons, P; Retrohippocampal region, RHP; Cerebellum, CB; Cerebral nuclei, CNU; olfactory bulb, OLF; Hindbrain, HB.

| RNA binding protein | UTR structure             | Domain | Plane    | $\rho$ |
|---------------------|---------------------------|--------|----------|--------|
| Prpf31              | Degs2                     | PAL    | sagittal | 0.97   |
| Prpf31              | Scara5,Igf2,Ddo,Bspry     | PAL    | sagittal | 0.92   |
| Prpf31              | Pde6a                     | PAL    | sagittal | 0.91   |
| Prpf31              | 4732473B16Rik             | PAL    | sagittal | 0.90   |
| Nufip1              | Prpf31                    | PAL    | sagittal | 0.90   |
| Zc3h8               | 6720467C03Rik             | TH     | sagittal | 0.96   |
| Neurod1             | Scube1                    | IB,TH  | coronal  | 0.96   |
| Neurod1             | mCG1027775.1              | TH     | sagittal | 0.96   |
| Neurod1             | mCG1027775.1              | IB     | sagittal | 0.95   |
| Neurod1             | Kcnd2                     | TH     | coronal  | 0.94   |
| Neurod1             | Vav2,Prkar2a              | IB,TH  | coronal  | 0.93   |
| Neurod1             | Rreb1                     | HIP    | coronal  | 0.93   |
| Neurod1             | Kcnd2                     | IB     | coronal  | 0.93   |
| Neurod1             | Pou4f1                    | TH,IB  | coronal  | 0.92   |
| Neurod1             | Lhfp12,Adcyap1r1          | HIP    | coronal  | 0.91   |
| Neurod1             | C130038G02Rik             | TH     | coronal  | 0.91   |
| Neurod1             | Sipa112,1810073G14Rik     | HIP    | coronal  | 0.90   |
| Neurod1             | Ebf4                      | TH     | coronal  | 0.90   |
| Tnfrsf12a           | Tera                      | MY     | coronal  | 0.95   |
| Rbpms               | Ppig                      | IB,TH  | sagittal | 0.95   |
| Rbpms               | Ppig                      | BS     | sagittal | 0.92   |
| Ppie                | Tom111,Anxa4              | PAL    | sagittal | 0.95   |
| Ppie                | Polr2d                    | PAL    | sagittal | 0.93   |
| Sf4                 | Galr2                     | MY     | sagittal | 0.94   |
| Tnfrsf19            | Slc35e4                   | HY     | sagittal | 0.93   |
| Tnfrsf19            | Flt3l                     | P      | sagittal | 0.93   |
| Ssbp4               | Tspyl2                    | HIP    | coronal  | 0.93   |
| Ssbp4               | Gpd1                      | HIP    | coronal  | 0.90   |
| Ppfia1              | Cd40                      | RHP    | sagittal | 0.93   |
| Ppfia1              | 2700078K21Rik             | RHP    | sagittal | 0.92   |
| Ppfia1              | Zbtb7b                    | RHP    | sagittal | 0.91   |
| Tnfrsf10b           | Ppfia1,Cd40,2610304G08Rik | RHP    | sagittal | 0.90   |
| Pabpc2              | Tsga14                    | P      | sagittal | 0.93   |
| Lsm4                | Stk24                     | IB,TH  | coronal  | 0.93   |
| Igf2bp2             | Spryd4                    | HY     | sagittal | 0.93   |
| Synj2               | Rab37                     | IB     | sagittal | 0.92   |
| Synj2               | Sptlc2                    | IB     | coronal  | 0.91   |
| Synj2               | Apbb2                     | IB     | sagittal | 0.91   |
| Rsf1                | Stk24                     | IB,TH  | coronal  | 0.92   |
| Rc3h1               | Stk24                     | IB,TH  | coronal  | 0.92   |
| Rassf1              | D930048N14Rik             | PAL    | sagittal | 0.92   |
| Polr2g              | P2rx1                     | PAL    | sagittal | 0.92   |
| Cnksr2              | 1110007L15Rik             | TH     | sagittal | 0.92   |
| Cnksr2              | Ipmk                      | TH     | sagittal | 0.90   |
| Samhd1              | Stk24                     | IB,TH  | coronal  | 0.91   |
| Rnpc3               | Arf6                      | RHP    | sagittal | 0.91   |
| Prpf38a             | Ppfia2                    | CB     | sagittal | 0.91   |
| Prpf38a             | My14                      | PAL    | coronal  | 0.91   |

**Table S3:** continued

| RNA binding protein | UTR structure | Domain | Plane    | $\rho$ |
|---------------------|---------------|--------|----------|--------|
| Ppfia2              | Prpf38a       | CB     | sagittal | 0.91   |
| Ppp1r9a             | Ngef          | CNU    | coronal  | 0.91   |
| Myef2               | Stk24         | IB,TH  | coronal  | 0.91   |
| Lcp2                | Adra2b        | PAL    | sagittal | 0.91   |
| Lancl2              | Dlx1          | RHP    | sagittal | 0.91   |
| Hnrpl1              | Wnt6          | HY     | coronal  | 0.91   |
| Fanc1               | Ddx52         | HY     | sagittal | 0.91   |
| Cnksr3              | Slc25a37      | IB     | sagittal | 0.91   |
| B230120H23Rik       | Nat6          | RHP    | sagittal | 0.91   |
| B230120H23Rik       | Grb7,Gbp6     | RHP    | sagittal | 0.90   |
| Anks3               | Cdk4          | PAL    | sagittal | 0.91   |
| Zc3hav1             | Wars2         | RHP    | sagittal | 0.90   |
| Sfrs1               | 1200013B08Rik | OLF    | sagittal | 0.90   |
| Samd4b              | Fancg         | RHP    | sagittal | 0.90   |
| Prpf39              | Siglecg       | RHP    | sagittal | 0.90   |
| Prpf38b             | Cnmm1         | HIP    | coronal  | 0.90   |
| Nip7                | Galr2         | HB     | sagittal | 0.90   |
| Lancl1              | Cdk4          | PAL    | sagittal | 0.90   |

**Table S4:** Brain-wide correlated expression with  $\rho \geq 0.85$  of structured UTR probes and transcripts coding for RNA binding proteins. *Khdrbs3*, *Lancl1*, *Neurod1* and *Ppp1r9a* code for an RNA binding protein and have a structured UTR. The plane orientation of all examples is the same for both transcripts.

| RNA binding protein | UTR structure  | Domain | Plane    | $\rho$ |
|---------------------|----------------|--------|----------|--------|
| Khdrbs3             | Opcml          | Brain  | coronal  | 0.86   |
| Lancl1              | 6530418L21Rik  | Brain  | coronal  | 0.86   |
| Lancl1              | Chn1           | Brain  | coronal  | 0.85   |
| Neurod1             | Atp2a3         | Brain  | sagittal | 0.85   |
| Neurod1             | Chn2           | Brain  | sagittal | 0.88   |
| Neurod1             | Trim62         | Brain  | sagittal | 0.90   |
| Neurod1             | Zfx2as         | Brain  | sagittal | 0.86   |
| Ppp1r9a             | Ngef           | Brain  | coronal  | 0.86   |
| Ppp1r9a             | Phactr1        | Brain  | coronal  | 0.86   |
| Tnrc4               | Camkv          | Brain  | coronal  | 0.87   |
| Zfp365              | 6530418L21Rik  | Brain  | coronal  | 0.86   |
| Zfp365              | A230097P14Rik* | Brain  | coronal  | 0.86   |
| Zfp365              | Chn1           | Brain  | coronal  | 0.87   |
| Zfp365              | Pcsk2          | Brain  | coronal  | 0.86   |

**Table S5:** For 21 RNA binding proteins we found binding sites close to UTR structures. The relative position of the binding site to the UTR structure can be 5' or 3' (50 nts up- or downstream), in a stem, hairpin loop, interior loop (including bulges and multiloops), hinge (bifurcation), or "fiftyfifty" if exactly 50% of positions are base paired. The hits of a binding protein are quantitative significant (\*) if their number is larger than the 95 percent confidence interval ( $p > 0.95$ ) of the number of hits in 100 dinucleotide shuffled sets of all structured UTRs.

| RNA binding protein | 5'   | 3'   | stem | loop | interior | hinge | fiftyfifty | Total | p>0.95 |
|---------------------|------|------|------|------|----------|-------|------------|-------|--------|
| Rbmx                | 7629 | 7490 | 4397 | 1869 | 1438     | 687   | 2372       | 25882 | *      |
| Mbnl1               | 6234 | 6300 | 4259 | 1318 | 913      | 552   | 2127       | 21703 | *      |
| Eif4b               | 5578 | 5974 | 3209 | 1403 | 1080     | 584   | 1986       | 19814 | *      |
| Pabpc1              | 4692 | 5085 | 1072 | 1429 | 1285     | 949   | -          | 14512 | *      |
| Khsrp               | 4023 | 3951 | 2536 | 903  | 699      | 328   | 1070       | 13510 | *      |
| Rbmy1a1             | 1052 | 1114 | 460  | 346  | 292      | 147   | -          | 3411  |        |
| Khdrbs3             | 349  | 380  | 90   | 158  | 90       | 69    | 48         | 1184  | *      |
| sap-49              | 332  | 316  | 202  | 77   | 53       | 21    | 74         | 1075  |        |
| Ybx2-a              | 231  | 234  | 173  | 97   | 76       | 38    | 42         | 891   | *      |
| Hnrnpa1             | 224  | 235  | 150  | 31   | 30       | 14    | 76         | 760   |        |
| Ybx1                | 130  | 156  | 66   | 31   | 28       | 18    | 39         | 468   |        |
| Snrpa               | 108  | 112  | 78   | 24   | 22       | 18    | -          | 362   |        |
| Elavl2              | 122  | 73   | 42   | 29   | 40       | 8     | -          | 314   | *      |
| Zfp36               | 48   | 60   | 32   | 22   | 10       | 8     | -          | 180   | *      |
| Qk                  | 66   | 33   | 6    | 18   | 10       | 3     | -          | 136   |        |
| Vts1                | 18   | 25   | 43   | 9    | 5        | -     | -          | 100   |        |
| Sfrs2               | 5    | 7    | 1    | -    | -        | -     | -          | 13    |        |
| Sfrs1               | 1    | 1    | -    | -    | -        | -     | -          | 2     |        |
| Elavl1              | 1    | -    | -    | -    | -        | -     | -          | 1     |        |
| Igf2bp1             | -    | 1    | -    | -    | -        | -     | -          | 1     |        |
| Rna15               | 1    | -    | -    | -    | -        | -     | -          | 1     |        |

**Table S6:** The 4 structured putative ncRNA probes with their brain-wide correlated expressed transcripts ( $\rho > 0.8$ ). Plane orientation is the same for both transcripts.

| Image Series | Gene Symbol   | Image Series | Gene Symbol | Domain | Plane    | $\rho$ |
|--------------|---------------|--------------|-------------|--------|----------|--------|
| 70795853     | TC1462951     | 69353203     | R3hdm2      | Brain  | sagittal | 0.8287 |
| 70795853     | TC1462951     | 79669509     | Kcnb1       | Brain  | sagittal | 0.8247 |
| 70795853     | TC1462951     | 70795841     | Cacnb4      | Brain  | sagittal | 0.8125 |
| 70795853     | TC1462951     | 69014848     | Nlk         | Brain  | sagittal | 0.8056 |
| 70795853     | TC1462951     | 70546006     | Ier5        | Brain  | sagittal | 0.8053 |
| 74512028     | mCG145872     | 79567505     | Mef2c       | Brain  | coronal  | 0.8238 |
| 74512028     | mCG145872     | 74658082     | Itgav       | Brain  | coronal  | 0.8044 |
| 69446893     | Raph1         | 69528040     | Baalc       | Brain  | sagittal | 0.8079 |
| 72340194     | A230057G18Rik | 74882787     | Ptprs       | Brain  | coronal  | 0.8413 |
| 72340194     | A230057G18Rik | 74583118     | Cri1        | Brain  | coronal  | 0.8317 |
| 72340194     | A230057G18Rik | 74511805     | Flot2       | Brain  | coronal  | 0.8243 |
| 72340194     | A230057G18Rik | 74882810     | Rpl15       | Brain  | coronal  | 0.8076 |
| 72340194     | A230057G18Rik | 74800953     | Stard7      | Brain  | coronal  | 0.8009 |
| 72340194     | A230057G18Rik | 75042254     | Glg1        | Brain  | coronal  | 0.8003 |

**Table S7:** The 33 structured putative ncRNA transcripts with locally correlated expressed transcripts ( $\rho > 0.9$ ). The plane orientation of all examples is the same for both transcripts. Brain region abbreviations: cortical plate, CTXpl; olfactory bulb, OLF; hippocampus, HPF; striatum, STR; pallium, PAL; thalamus, TH; midbrain, MB; medulla, MY; hypothalamus, HY; pons, P; Retrohippocampal region, RHP; Hippocampal region, HIP; Hindbrain, HB; Brain stem, BS; Interbrain, IB; Cerebral nuclei, CNU.

| Image Series | Gene Symbol   | Image Series | Gene Symbol    | Domain | Plane    | $\rho$ |
|--------------|---------------|--------------|----------------|--------|----------|--------|
| 74509470     | D130051D11Rik | 74635192     | Cuzd1          | P      | sagittal | 0.9151 |
| 70228573     | A630076J17Rik | 68797846     | Acox1          | TH     | sagittal | 0.9274 |
| 69514476     | A930033H14Rik | 68563116     | Cd4            | RHP    | sagittal | 0.9054 |
| 71809019     | 9130227L01Rik | 71492904     | 1700126L10Rik  | OLF    | sagittal | 0.9184 |
| 71809019     | 9130227L01Rik | 71212416     | mCG146162      | OLF    | sagittal | 0.9126 |
| 71809019     | 9130227L01Rik | 75861005     | Klra2          | OLF    | sagittal | 0.9110 |
| 71809019     | 9130227L01Rik | 70725615     | LOC434793      | OLF    | sagittal | 0.9093 |
| 71809019     | 9130227L01Rik | 71212563     | mCG147505      | OLF    | sagittal | 0.9070 |
| 71809019     | 9130227L01Rik | 70194606     | Usmg1          | OLF    | sagittal | 0.9068 |
| 71809019     | 9130227L01Rik | 76081839     | Slmap          | OLF    | sagittal | 0.9018 |
| 71832856     | Gm816         | 68667866     | Slfn1          | HIP    | sagittal | 0.9048 |
| 71764401     | Gm831         | 68632014     | Pip            | P      | sagittal | 0.9153 |
| 73818824     | AI452102      | 71492934     | 2010208K18Rik  | OLF    | sagittal | 0.9008 |
| 73818824     | AI452102      | 633294       | Sfxn1          | RHP    | sagittal | 0.9144 |
| 74736117     | LOC380685     | 70238728     | D730002M21Rik  | PAL    | sagittal | 0.9229 |
| 71570762     | Gm933         | 77790736     | 2210020M01Rik  | HY     | sagittal | 0.9876 |
| 71570762     | Gm933         | 68498717     | Wdr78          | HY     | sagittal | 0.9326 |
| 71570762     | Gm933         | 73870623     | C530030P08Rik* | HY     | sagittal | 0.9151 |
| 70238770     | D830035M03Rik | 68797846     | Acox1          | TH     | sagittal | 0.9365 |
| 77924420     | Gm1715        | 76081920     | Vkorc11l       | HB     | sagittal | 0.9240 |
| 77924420     | Gm1715        | 77910816     | 3110040N11Rik  | HB     | sagittal | 0.9227 |
| 77924420     | Gm1715        | 77910816     | 3110040N11Rik  | MY     | sagittal | 0.9285 |
| 77924420     | Gm1715        | 76081920     | Vkorc11l       | MY     | sagittal | 0.9248 |
| 77924420     | Gm1715        | 76081920     | Vkorc11l       | BS     | sagittal | 0.9177 |
| 77924420     | Gm1715        | 77910816     | 3110040N11Rik  | BS     | sagittal | 0.9036 |
| 70300019     | Gm1716        | 68797846     | Acox1          | MB     | sagittal | 0.9654 |
| 74514276     | LOC432876     | 631713       | Emg1           | HIP    | sagittal | 0.9460 |
| 74514276     | LOC432876     | 631713       | Emg1           | HPF    | sagittal | 0.9460 |
| 74509554     | LOC432907     | 69608088     | Crygc          | OLF    | sagittal | 0.9113 |
| 74509554     | LOC432907     | 69608088     | Crygc          | CTXpl  | sagittal | 0.9052 |
| 70723050     | LOC433280     | 69261398     | BC026439       | P      | sagittal | 0.9016 |
| 70723223     | LOC433405     | 68151448     | Tsga14         | P      | sagittal | 0.9050 |
| 70723223     | LOC433405     | 70723632     | 1700022A21Rik  | PAL    | sagittal | 0.9014 |
| 70303725     | LOC433503     | 79762714     | Gpx3           | HIP    | sagittal | 0.9186 |
| 70303725     | LOC433503     | 79762714     | Gpx3           | HPF    | sagittal | 0.9171 |
| 74635186     | LOC433965     | 69608088     | Crygc          | OLF    | sagittal | 0.9091 |
| 73635375     | mCG1030139    | 69258178     | Mtnr1b         | IB     | sagittal | 0.9068 |
| 73635375     | mCG1030139    | 69258178     | Mtnr1b         | TH     | sagittal | 0.9157 |
| 74635445     | mCG1044749.1  | 70228167     | 9530002K18Rik  | OLF    | sagittal | 0.9370 |
| 74635445     | mCG1044749.1  | 70786839     | LOC433816      | OLF    | sagittal | 0.9331 |
| 74635445     | mCG1044749.1  | 71212578     | mCG147545      | OLF    | sagittal | 0.9299 |
| 74635445     | mCG1044749.1  | 77454548     | Xlr3a          | OLF    | sagittal | 0.9276 |
| 74635445     | mCG1044749.1  | 73748776     | F830225E14Rik* | OLF    | sagittal | 0.9269 |
| 74635445     | mCG1044749.1  | 68196921     | Igsf9          | OLF    | sagittal | 0.9246 |
| 74635445     | mCG1044749.1  | 75988299     | BC028799       | OLF    | sagittal | 0.9148 |
| 74635445     | mCG1044749.1  | 74431453     | Slc16a8        | OLF    | sagittal | 0.9147 |
| 74635445     | mCG1044749.1  | 71574600     | C79127         | OLF    | sagittal | 0.9134 |
| 74635445     | mCG1044749.1  | 69608088     | Crygc          | OLF    | sagittal | 0.9120 |



Table S7: continued

| Image Series | Gene Symbol    | Image Series | Gene Symbol    | Domain | Plane    | $\rho$ |
|--------------|----------------|--------------|----------------|--------|----------|--------|
| 74635445     | mCG1044749.1   | 74821969     | Fabp4          | OLF    | sagittal | 0.9114 |
| 74635445     | mCG1044749.1   | 75831767     | Cd300lf        | OLF    | sagittal | 0.9114 |
| 74635445     | mCG1044749.1   | 70725579     | Gm1966         | OLF    | sagittal | 0.9104 |
| 74635445     | mCG1044749.1   | 71808741     | 4930451G09Rik  | OLF    | sagittal | 0.9018 |
| 74635445     | mCG1044749.1   | 68151448     | Tsga14         | P      | sagittal | 0.9258 |
| 74635445     | mCG1044749.1   | 70228167     | 9530002K18Rik  | CTXpl  | sagittal | 0.9158 |
| 74635445     | mCG1044749.1   | 73748776     | F830225E14Rik* | CTXpl  | sagittal | 0.9067 |
| 74635445     | mCG1044749.1   | 70786839     | LOC433816      | CTXpl  | sagittal | 0.9056 |
| 74635445     | mCG1044749.1   | 68196921     | Igsf9          | CTXpl  | sagittal | 0.9046 |
| 74635445     | mCG1044749.1   | 77454548     | Xlr3a          | CTXpl  | sagittal | 0.9022 |
| 74510254     | mCG1048826     | 631713       | Emg1           | HIP    | sagittal | 0.9302 |
| 74510254     | mCG1048826     | 631713       | Emg1           | HPF    | sagittal | 0.9302 |
| 71212268     | mCG145872      | 69257660     | Gpr87          | HY     | sagittal | 0.9098 |
| 71212268     | mCG145872      | 68861730     | 2810410C14Rik  | HY     | sagittal | 0.9008 |
| 74736456     | LOC546269      | 73513492     | AY702103       | MY     | sagittal | 0.9086 |
| 73513717     | E130008D07Rik  | 68797846     | Acox1          | TH     | sagittal | 0.9129 |
| 75043641     | LOC545466      | 70946226     | Cybas3         | HB     | sagittal | 0.9338 |
| 75043641     | LOC545466      | 70946226     | Cybas3         | MY     | sagittal | 0.9403 |
| 75043641     | LOC545466      | 71609044     | Zfp54          | MY     | sagittal | 0.9101 |
| 75043641     | LOC545466      | 74277702     | LOC545904      | MY     | sagittal | 0.9030 |
| 75043641     | LOC545466      | 73927700     | 7420458B01Rik* | MY     | sagittal | 0.9028 |
| 75043641     | LOC545466      | 70946226     | Cybas3         | BS     | sagittal | 0.9004 |
| 73808450     | 9530020O07Rik* | 68845741     | Frap1          | HY     | sagittal | 0.9315 |
| 74427061     | 0610007N19Rik  | 74300729     | C330006D17Rik* | P      | sagittal | 0.9002 |
| 74427061     | 0610007N19Rik  | 74580978     | TC1480793      | HY     | sagittal | 0.9442 |
| 74427061     | 0610007N19Rik  | 73767187     | F730219E24Rik* | HY     | sagittal | 0.9360 |
| 74427061     | 0610007N19Rik  | 69524566     | AI461788       | HY     | sagittal | 0.9232 |
| 74427061     | 0610007N19Rik  | 74357833     | 1700026J04Rik* | HY     | sagittal | 0.9071 |
| 74635108     | 1700123J19Rik  | 68797846     | Acox1          | MB     | sagittal | 0.9729 |
| 69443268     | 5031434O11Rik  | 71891539     | Hoxa7          | PAL    | sagittal | 0.9009 |
| 70218318     | 4930545L08Rik  | 71148223     | Mm.152121      | HY     | sagittal | 0.9336 |
| 70218318     | 4930545L08Rik  | 70302890     | Ugt1a1         | HY     | sagittal | 0.9183 |
| 70295536     | Gm57           | 68797846     | Acox1          | TH     | sagittal | 0.9115 |
| 70295859     | Gm559          | 69028635     | 0610012H03Rik  | CNU    | sagittal | 0.9375 |
| 70295859     | Gm559          | 69028635     | 0610012H03Rik  | STR    | sagittal | 0.9384 |
| 70295948     | Gm582          | 79534912     | Aqp1           | RHP    | sagittal | 0.9027 |

**Table S8:** For correlated expressed ncRNAs we predict putative RNA-RNA interaction sites to their correlated RNA using **RNAplfold** and **RNAplex**. GC content and length of the interaction site are the average of both sequences. The RNA-RNA interaction is shown in dot-bracket format in which the symbol '&' separates both sequences. Abbreviation: Minimum free energy, MFE. The plane orientation of all examples is the same for both transcripts. Brain region abbreviations: cortical plate, CTXpl; olfactory bulb, OLF; hypothalamus, HY; pons, P; Retrohippocampal region, RHP.

| ncRNA          | mRNA              | interaction                                               | MFE    | GC   | length | p-value | Domain | Plane    | $\rho$ |
|----------------|-------------------|-----------------------------------------------------------|--------|------|--------|---------|--------|----------|--------|
| LOC433503      | Gpx3 (3'-UTR)     | (((((.((((((((((((((&))))))))))))))))))                   | -22.80 | 0.57 | 19     | 0.0097  | P      | sagittal | 0.90   |
| TC1462951      | Kcnb1 (3'-UTR)    | (((((((((((&))))))))))                                    | -14.34 | 0.65 | 10     | 0.1421  | Brain  | sagittal | 0.82   |
| TC1462951      | Nlk (3'-UTR)      | (((((((((((&)))))).))))                                   | -13.05 | 0.60 | 12     | 0.2312  | Brain  | sagittal | 0.81   |
| TC1462951      | Ier5 (3'-UTR)     | (((((.(.(((((((((&)))))).))))))                           | -13.16 | 0.43 | 15     | 0.2335  | Brain  | sagittal | 0.81   |
| TC1462951      | R3hdm2 (3'-UTR)   | (((((((((((.(((..(((((((((&)))))))))).))))))              | -13.13 | 0.45 | 22     | 0.2912  | Brain  | sagittal | 0.83   |
| TC1462951      | Dusp3 (3'-UTR)    | ((.((((((((((((((&))))))))))..))                          | -13.56 | 0.70 | 16     | 0.3209  | Brain  | sagittal | 0.85   |
| A930033H14Rik  | Cd4 (5'-UTR)      | (((((((((((.(((..(((((((((&))))...))))..))))..))))..))    | -15.18 | 0.53 | 27     | 0.2256  | RHP    | sagittal | 0.91   |
| mCG145872      | Itgav (3'-UTR)    | (((((((((((&))))))))))                                    | -12.91 | 0.67 | 9      | 0.2700  | Brain  | coronal  | 0.80   |
| LOC432907      | Crygc (3'-UTR)    | (((((.((((((((((&)))))).))))                              | -10.73 | 0.58 | 12     | 0.6508  | OLF    | sagittal | 0.91   |
| LOC432907      | Crygc (3'-UTR)    | (((((.((((((((((&)))))).))))                              | -10.73 | 0.58 | 12     | 0.6508  | CTXpl  | sagittal | 0.91   |
| LOC433280      | BC026439 (5'-UTR) | (((((.((((((((((((((.(((..(((((((((&))))..)))))).....)))) | -11.58 | 0.62 | 30     | 0.6652  | P      | sagittal | 0.90   |
| 9530020O07Rik* | Frap1 (3'-UTR)    | (((((.((((((((((&))))))))))                               | -10.67 | 0.79 | 12     | 0.7205  | HY     | sagittal | 0.93   |
| D130051D11Rik  | Cuzd1 (3'-UTR)    | (((((.((((((((((&)))))).))))                              | -8.00  | 0.50 | 14     | 0.9425  | P      | sagittal | 0.92   |

## Additional Figures

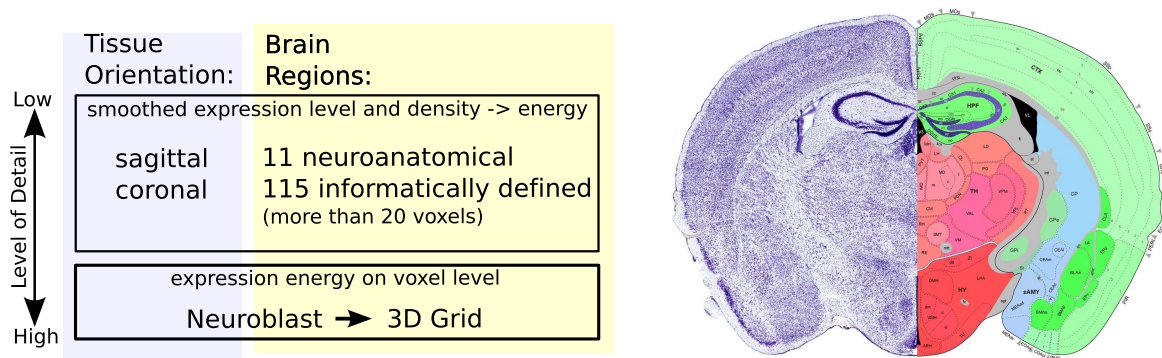

**Figure S1:** Mapping Allen Mouse Brain Atlas expression data. Tissue sections are generated in either the sagittal or coronal plane. The coronal plane contains both hemispheres and thus provides a template for more accurate registration and informatically defined structures. The measured expression level and density are combined to create expression energy. Both planes are mapped to 11 large neuroanatomical regions and 115 informatically defined regions. The image on the right shows a Nissl stain and the annotated regions of a coronal tissue section from the Allen Mouse Brain Atlas. Each informatically defined domain consists of more than 20 voxels that are interpolated over all images in either the sagittal or coronal orientation to a 3-dimensional grid. The 3D grid data represents the highest level of detail and is used for correlated expression analyses by NeuroBlast.

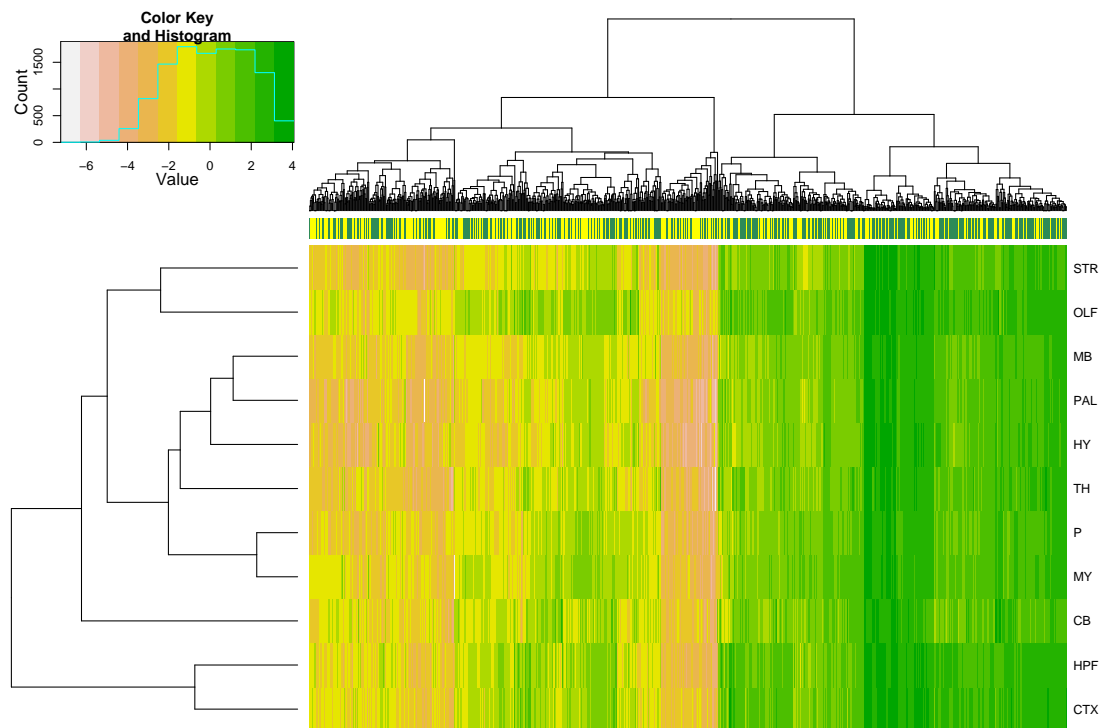

**Figure S2:** Heatmap of expression energy log-z-scores normalized over UTR probes and brain regions. The 5,126 structured UTR probes (green lines in the barcode in the top) and 4,467 non-structured UTR probes (yellow) are hierarchical clustered by their energy distribution (tree in the top) in the 11 neuroanatomical regions which are also hierarchical clustered (tree on the left side). The right branch of the probe expression tree exhibiting large expression is highly dominated by structured UTR probes. A random sample of 1/10th of all data was used. Brain region abbreviations: cortex, CTX; olfactory bulb, OLF; hippocampus, HPF; striatum, STR; pallidum, PAL; thalamus, TH; midbrain, MB; medulla, MY; hypothalamus, HY; cerebellum, CB; pons, P.

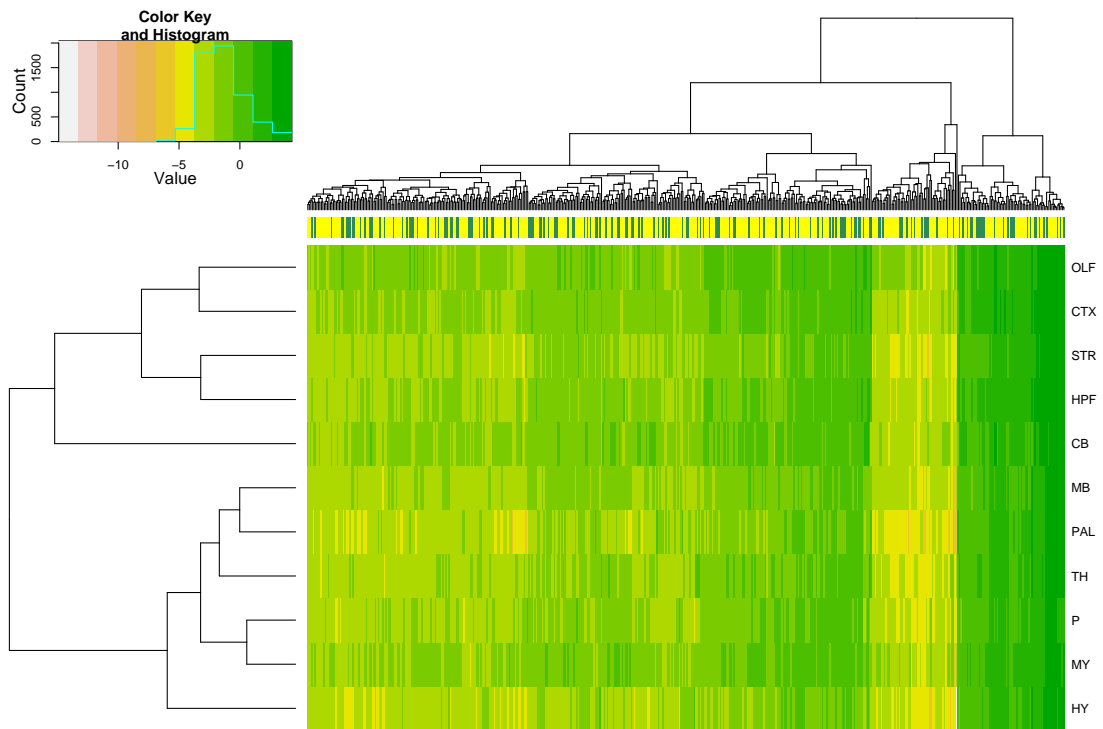

**Figure S3:** Heatmap of expression energy log-z-scores normalized over ncRNA probes and brain regions. The 163 structured putative ncRNA probes (green lines in the barcode in the top) and 338 non-structured ncRNA probes (yellow) are hierarchical clustered by their energy distribution (tree in the top) in the 11 neuroanatomical regions which are also hierarchical clustered (tree on the left side). Structured and non-structured putative ncRNAs have relatively similar distribution in the hierarchical expression tree. Brain region abbreviations: cortex, CTX; olfactory bulb, OLF; hippocampus, HPF; striatum, STR; pallium, PAL; thalamus, TH; midbrain, MB; medulla, MY; hypothalamus, HY; cerebellum, CB; pons, P.

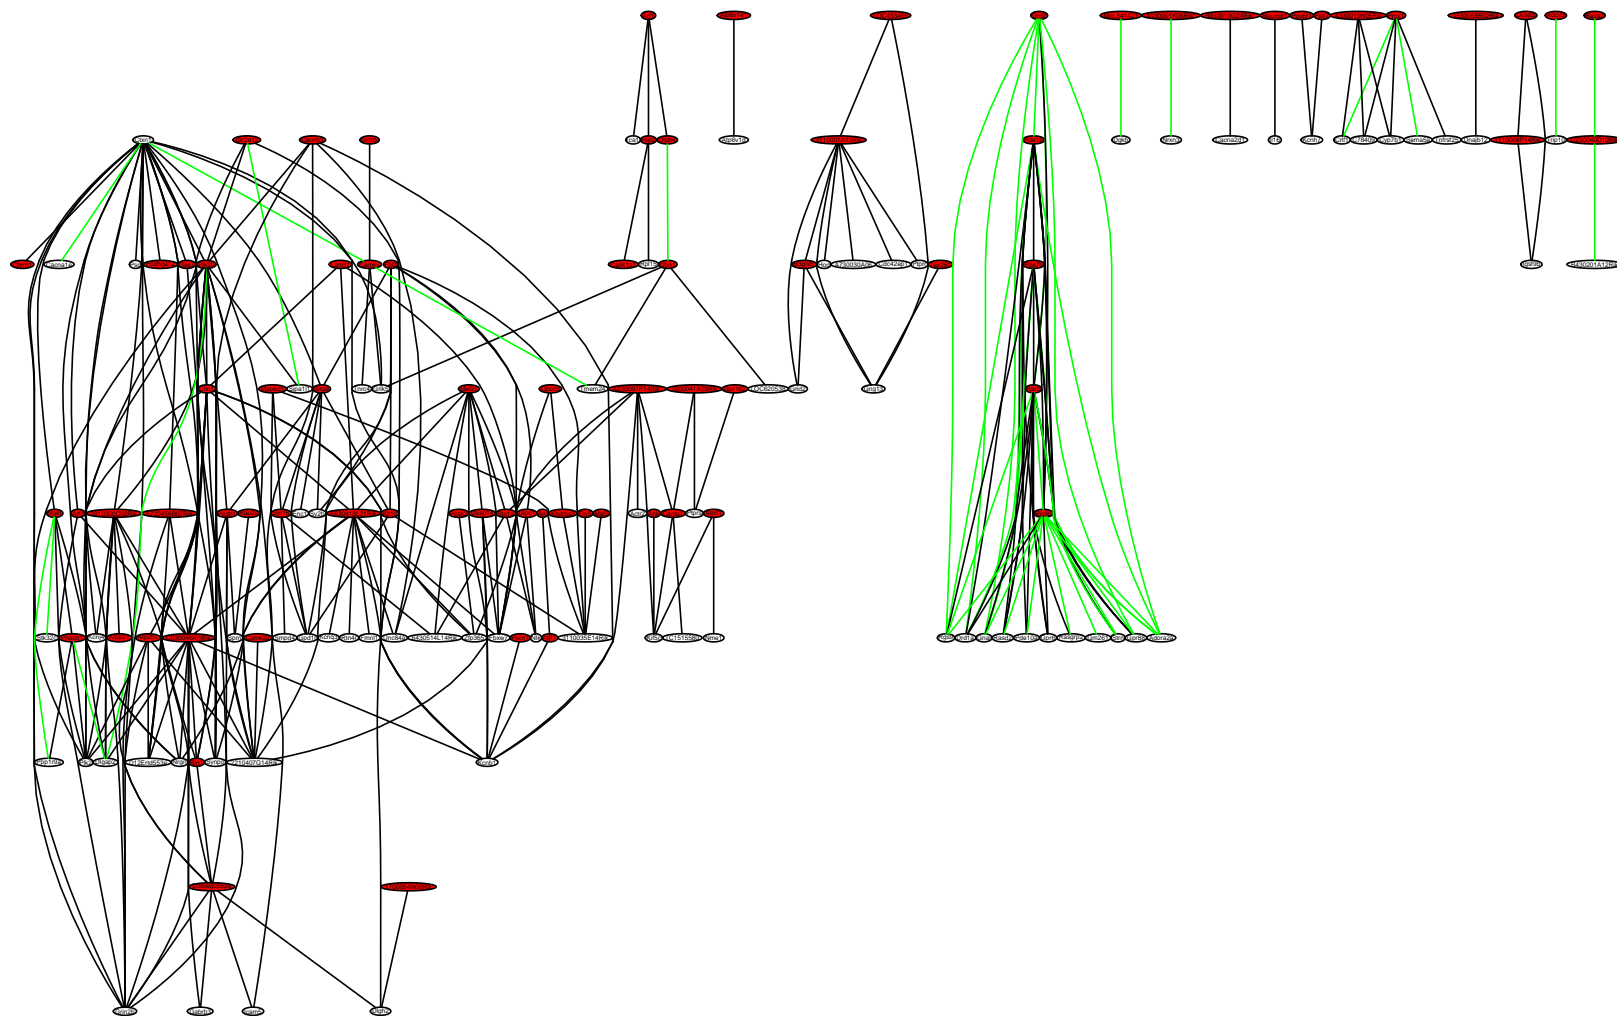

**Figure S4:** The correlated expression network of 78 structured Allen Mouse Brain Atlas transcripts (red nodes) with correlated expression over the entire brain. They are involved in 352 correlation pairs (edges,  $\rho \geq 0.85$ ). Some of them (green edges) also have spatial expression enrichments ( $\rho \geq 0.9$ ).

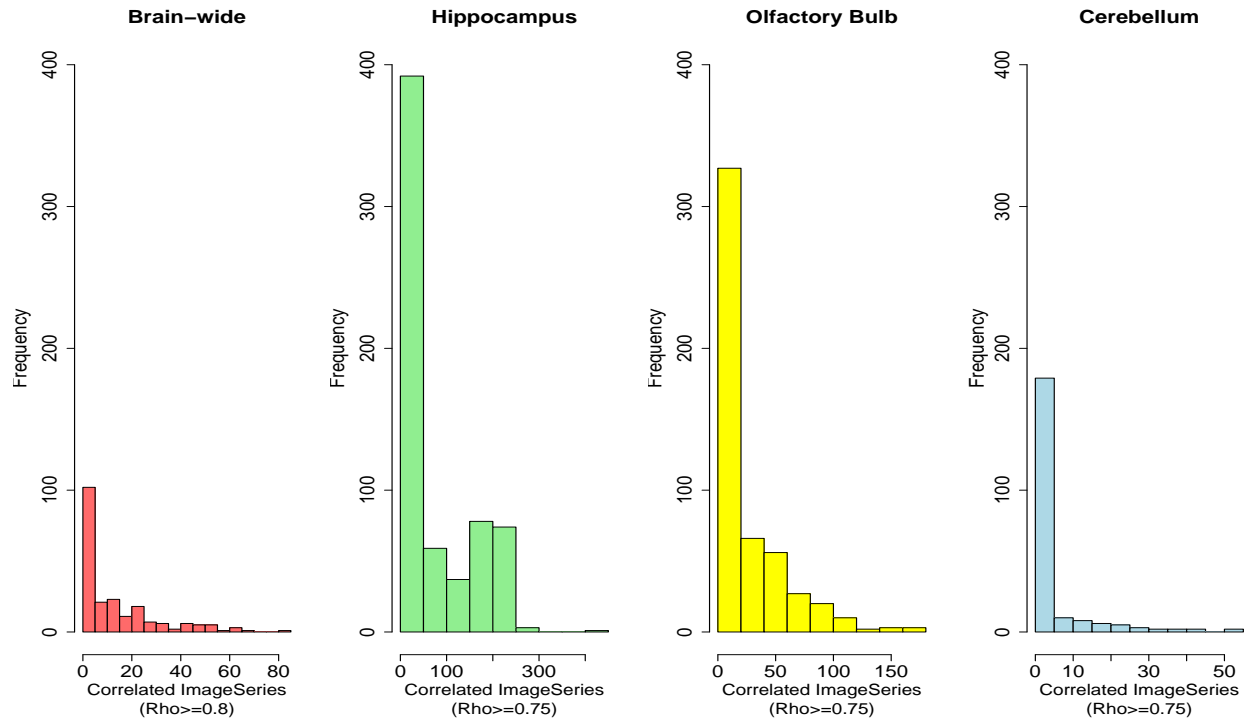

**Figure S5:** The number of correlated Allen Mouse Brain Atlas riboprobes per structured probe. Correlated coronal image series are counted brain-wide ( $\rho \geq 0.8$ ), and in the brain regions hippocampus ( $\rho \geq 0.75$ ), olfactory bulb ( $\rho \geq 0.75$ ) and cerebellum ( $\rho \geq 0.75$ ) (from left to right). In the 2,926 brain-wide correlation pairs (left barplot) 212 structured UTR transcripts are involved, of which 89 have less than 5 correlated expressed RNAs.

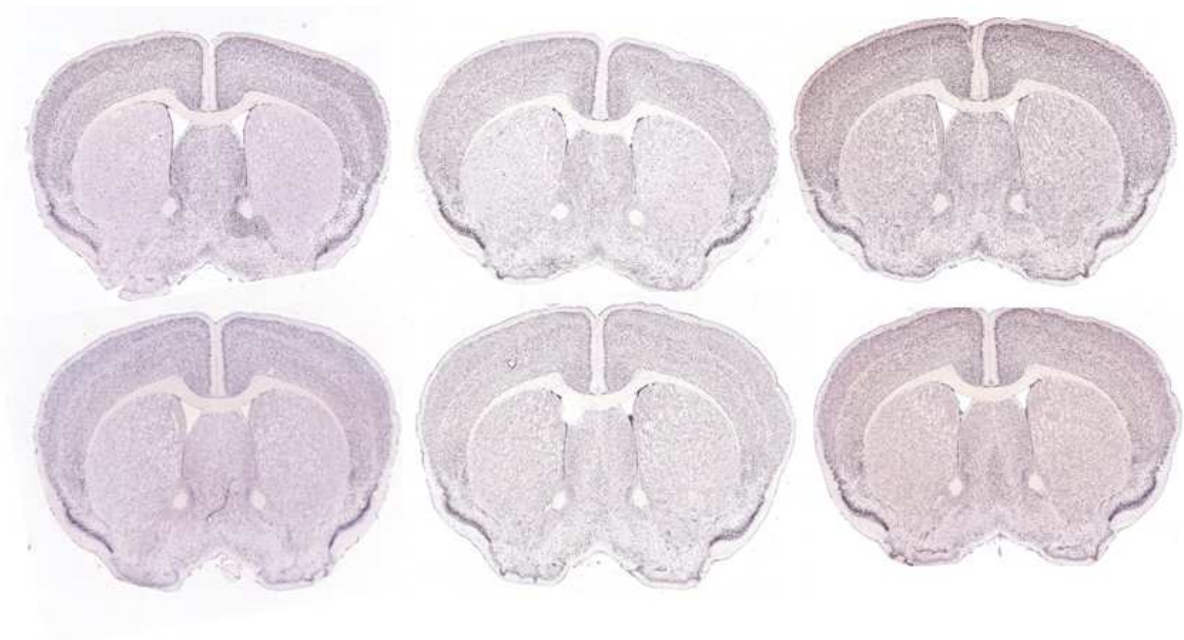

**Figure S6:** A representative coronal section showing *in situ* hybridization data primarily from the cortex and striatum from the structured ncRNA candidate *A230057G18Rik* (Miat) and the correlated expressed transcripts *Ptprs*, *Cri1*, *Flot2*, *Rpl15*, and *Stard7* (left to right, top to bottom). All probes show higher expression in the cortex compared to the striatum.

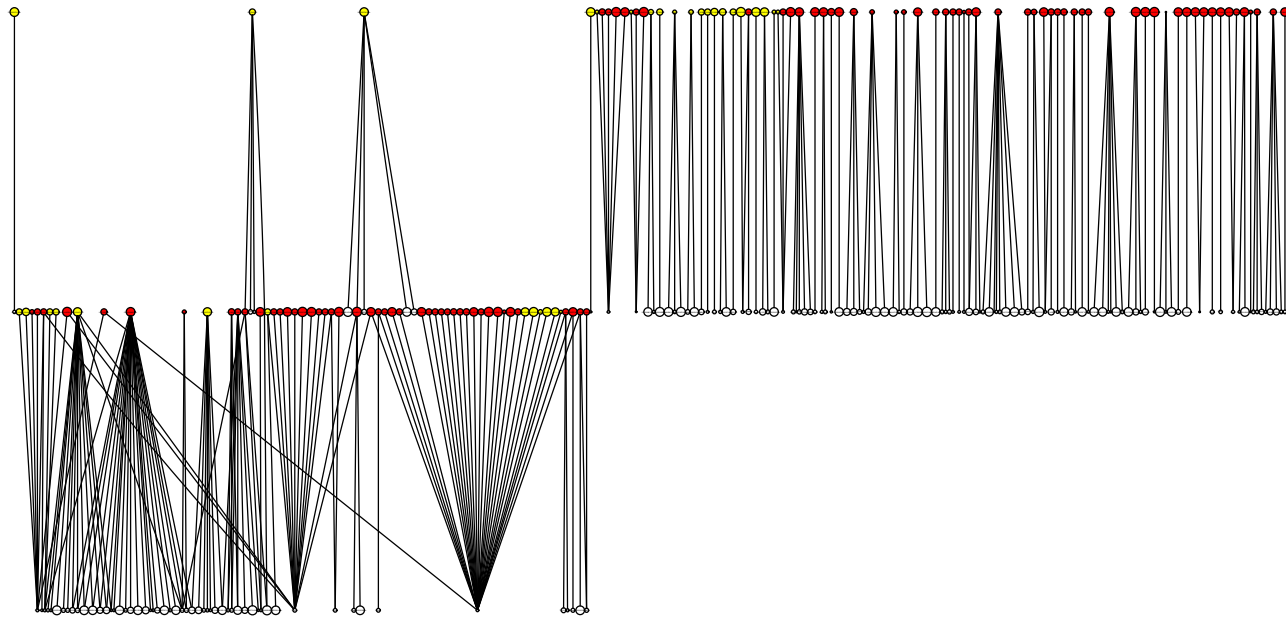

**Figure S7:** The correlation network of 134 putative ncRNA transcripts with strong locally correlated expression patterns. They are involved in 326 correlation pairs (edges,  $\rho > 0.9$ ). Red nodes represent transcripts without secondary RNA structure prediction and yellow nodes with structure predictions. However, the protein-coding probes *Acox1* (covariance to 25 putative ncRNAs in interbrain and thalamus, 7 in midbrain), *Sst* (2 in cerebellum), *Tsgal4* (16 mostly in pons), and *Pip* (3 in pons) have high local correlation coefficients to several long noncoding RNAs, but their expression in these domains is too low to get meaningful correlation coefficients.

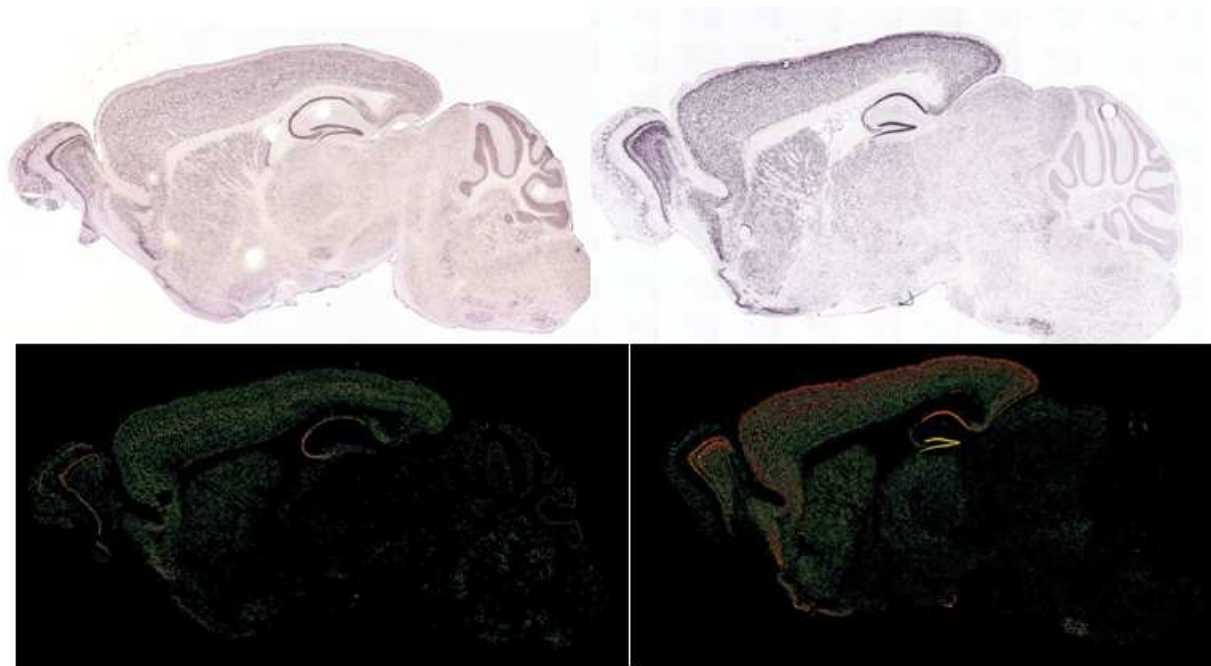

**Figure S8:** Gene expression shown by in situ hybridization (ISH) in one sagittal section from *TC1462951* (upper left panel) and *Kcnb1* (upper right panel). The lower panels show the corresponding expression mask for each of the ISH images. Both probes show strong expression in the cortex, hippocampus, striatum, olfactory bulb and lower expression in other brain regions such as the pons, medulla, midbrain, and cerebellum.

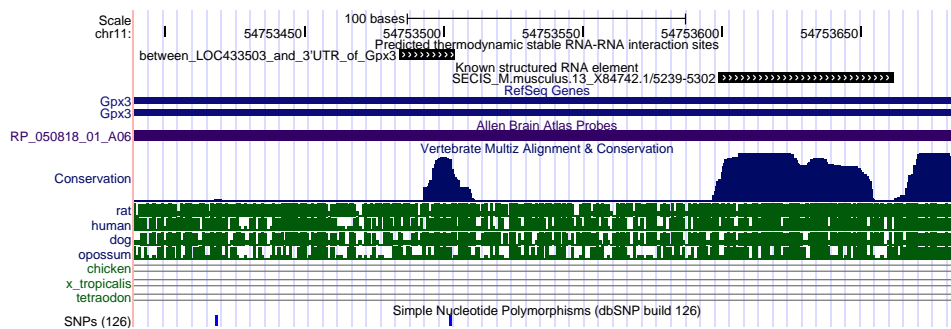

**Figure S9:** The predicted thermodynamic stable RNA-RNA interaction site between the structured ncRNA *LOC433503* and the 3'-UTR of *Gpx3* is located 100 nts upstream of a selenocysteine insertion sequence (SECIS) element as shown by tracks in the UCSC genome browser.



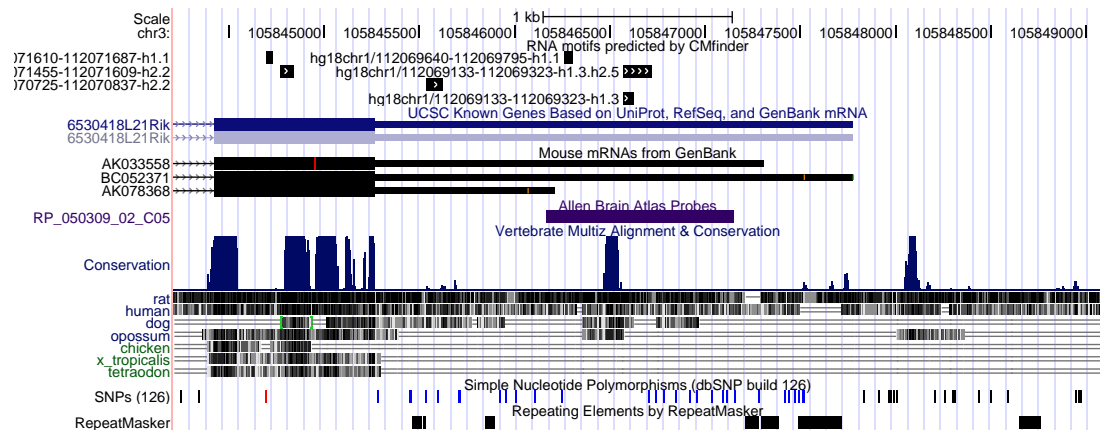

**Figure S10:** A large loop of the 3'-UTR structure *hg18chr1/112069133-112069323-h1.3.h2.5* of the hypothetical protein *6530418L21Rik* hosts a binding motif to the zinc finger protein *Zfp36* as shown by tracks in the UCSC genome browser. *6530418L21Rik* is brain-wide correlated expressed to the RNA binding proteins *Zfp365* and *Lancl1*.

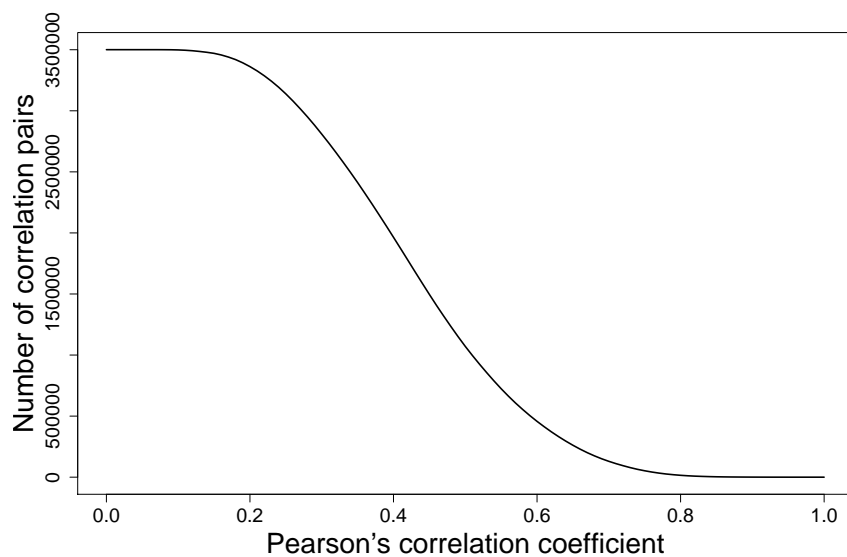

**Figure S11:** The relationship between the minimum Pearson's correlation coefficient  $\rho$  and the number of correlation pairs for regional covariance patterns of the 477 putative ncRNAs (intergenic and intronic RNA probes).

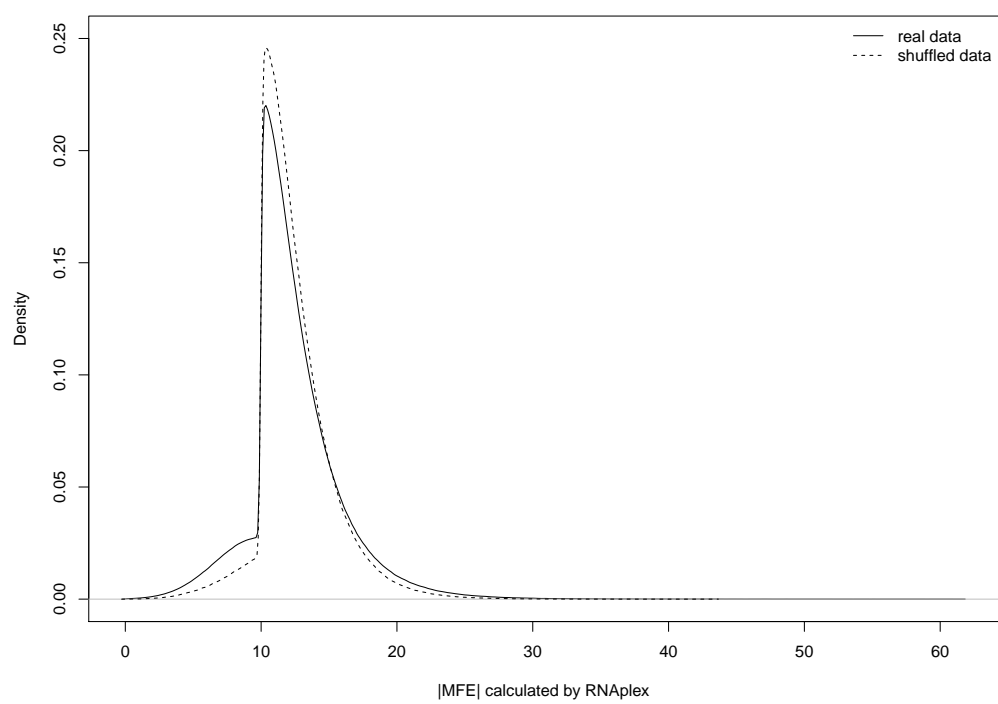

**Figure S12:** Extrem-value distribution of the MFE of RNA-RNA interactions for the real data and all dinucleotide shuffled data.

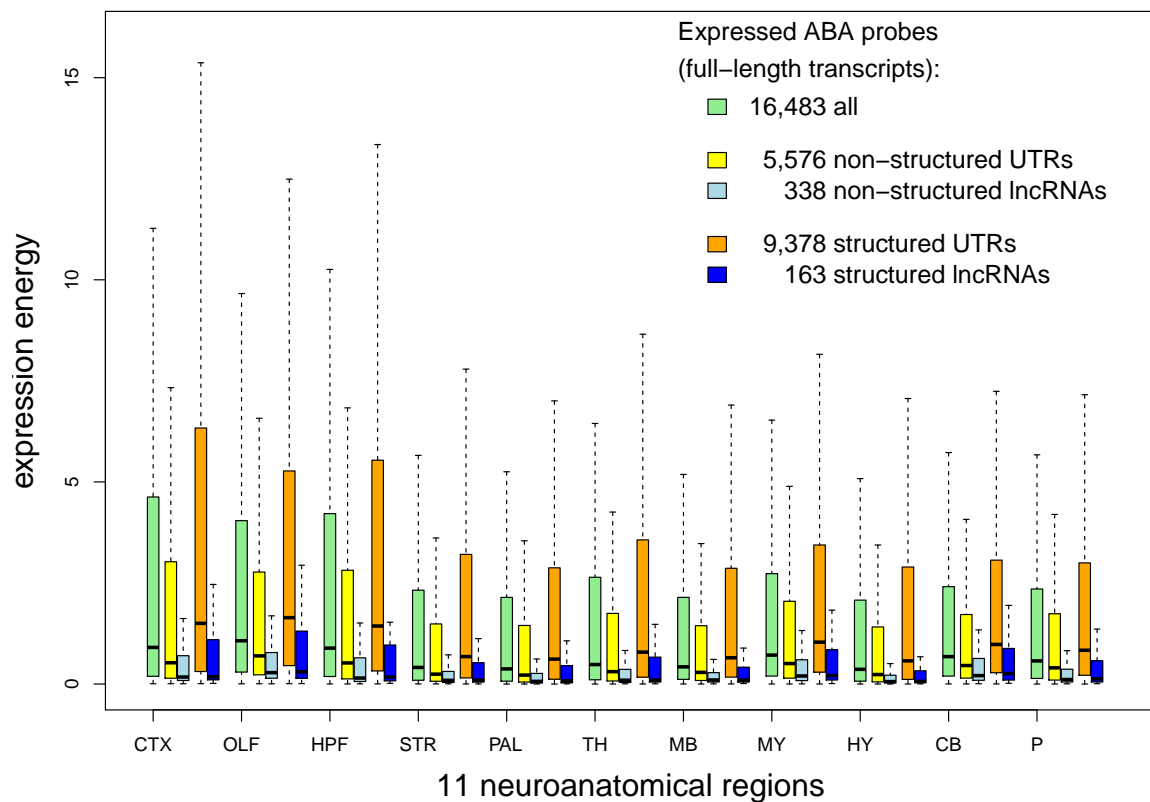

**Figure S13:** Comparison of expression energy distribution of all expressed Allen Mouse Brain Atlas probes, structured and nonstructured ncRNA and UTR probes in 11 neuroanatomical regions. UTR probes are considered as structured if any transcriptional isoform has an UTR structure. Secondary RNA structures are predicted by CMfinder. The box plot shows 1.5 interquartile range (dotted line), lower and upper quartile (box), and median (thick black line in the box). Brain region abbreviations: cortex, CTX; olfactory bulb, OLF; hippocampus, HPF; striatum, STR; pallidum, PAL; thalamus, TH; midbrain, MB; medulla, MY; hypothalamus, HY; cerebellum, CB; pons, P.

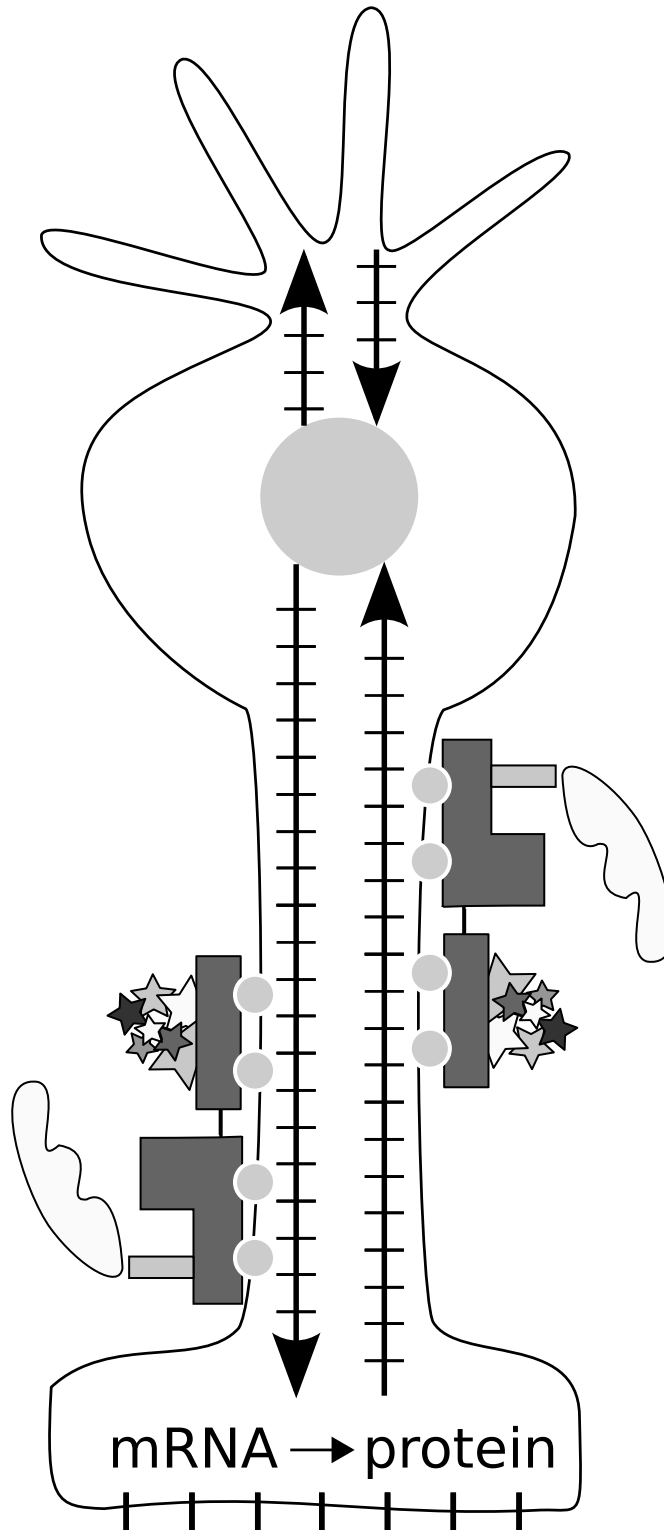

**Figure S14:** This cartoon illustrates the directed RNA transport theory. In a neuron consisting of dendrites, cell body with nucleus, axon and synapse (from top to bottom) the intracellular signal is transported along the cytoskeleton (symbolized by train tracks) from the nucleus to the synapse and dendrites as well as in the opposite direction back to the nucleus. The trains and railway carriages symbolize the motor and transport proteins and the stars symbolize the transported cargo. The transport is only going in one direction and, thus, the mRNAs coding for proteins involved in the signalling pathways have to be transported first to the location where the new transport starts. The UTR structures are needed to attach the mRNAs (stars), which themselves partly code for transport proteins, to the transport machinery (railway carriage).

## Supplementary References

- Cook, K. B., Kazan, H., Zuberi, K., Morris, Q., and Hughes, T. R. (2010). Rbpdb: a database of rna-binding specificities. *Nucleic Acids Res.*
- Lenhard, B. and Wasserman, W. W. (2002). Tfbs: Computational framework for transcription factor binding site analysis. *Bioinformatics*, **18**(8), 1135–1136.
- Torarinsson, E., Yao, Z., Wiklund, E. D., Bramsen, J. B., Hansen, C., Kjems, J., Tommerup, N., Ruzzo, W. L., and Gorodkin, J. (2008). Comparative genomics beyond sequence-based alignments: Rna structures in the encode regions. *Genome Res*, **18**(2), 242–251.
